# Supplementary material for: The long-term effects of drinking alcohol for stress coping on mental health symptoms among Fukushima nuclear plant workers: The Fukushima NEWS Project Study
Source: Research Square preprint supplement (doi:10.21203/rs.3.rs-8222286/v1), 2025-12-24
Supplement: Supplementary file 1 [file 75629416961f715ee062a8d6.docx]

**Appendix 1. Descriptive statistics of analysis sample at the time of the disaster in 2011 (1,107 individuals regardless of reported stress coping)**

| Numbers of subjects, N | 1,107 |
| --- | --- |
| Mean age, years | 39.7 |
| Male, % | 94.3 |
| Daiichi plant worker, % | 58.9 |
| Pre-existing psychiatric illness, % | 1.2 |
| Disaster-related experiences |  |
| - The experience of life-threatening danger, % | 40.6 |
| - Major property loss, % | 29.7 |
| - Experiences of discrimination/slurs, % | 13.5 |
| - The experience of escaping from a tsunami, % | 12.5 |
| - The witnessing of plant explosion, % | 26.2 |
| - The death of a family member, % | 6.1 |
| - The death of a colleague, % | 18.5 |
| - Home evacuation, % | 68.7 |

**Appendix 2. Trends of the IES-R, K6, AIS, and CAGE scores (1,107 individuals regardless of reported stress coping)**

|  | Year of survey | | | | | | | | |  |
| --- | --- | --- | --- | --- | --- | --- | --- | --- | --- | --- |
|  | 2012 | | | 2013 | | | 2014 | | | *p* for trend |
| (A) IES-R |  |  |  |  |  |  |  |  |  |  |
| Response rates of workers followed in each year, % | 1,107 |  | 100% | 1,107 |  | 100% | 626 |  | 56.5% |  |
| IES-R score, mean ± SD | 11.3 | ± | 12.2 | 11.3 | ± | 12.2 | 12.4 | ± | 13.7 | <0.001 a |
| IES-R ≥ 25, % | 12.9 |  |  | 12.9 |  |  | 16.6 |  |  | 0.004 b |
| (B) K6 |  |  |  |  |  |  |  |  |  |  |
| Response rates of workers followed in each year, % | 1,107 |  | 100% | 1,107 |  | 100% | 631 |  | 57.0% |  |
| K6 score, mean ± SD | 4.0 | ± | 4.1 | 4.0 | ± | 4.1 | 5.1 | ± | 5.0 | 0.02 a |
| K6 ≥ 13, % | 3.9 |  |  | 3.9 |  |  | 10.0 |  |  | <0.001 b |
| (C) AIS |  |  |  |  |  |  |  |  |  |  |
| Response rates of workers followed in each year, % | 1,107 |  | 100% | 1,107 |  | 100% | 633 |  | 57.2% |  |
| AIS score, mean ± SD | 5.0 | ± | 3.6 | 5.0 | ± | 3.6 | 5.9 | ± | 3.9 | <0.001 a |
| AIS ≥ 6, % | 39.9 |  |  | 39.9 |  |  | 48.0 |  |  | 0.001 b |
| (D) CAGE |  |  |  |  |  |  |  |  |  |  |
| Response rates of workers followed in each year, % | 1,107 |  | 100% | 1,107 |  | 100% | 633 |  | 57.2% |  |
| CAGE score, mean ± SD | 0.4 |  | 0.8 | 0.4 |  | 0.8 | 0.6 | ± | 1.0 | 0.027 a |
| CAGE ≥ 2, % | 9.4 |  |  | 9.4 |  |  | 16.3 |  |  | 0.007 b |

a Values based on the Wald test for the coefficient associated with time in a mixed-effect longitudinal beta regression model

b Values based on the Wald test for the coefficient associated with time in a mixed-effect logistic regression model

**Appendix 3. Details of reported stress coping (405 individuals)**

| Elements | N | % |
| --- | --- | --- |
| Sport | 193 | 47.7 |
| Family | 60 | 14.8 |
| Hobby | 52 | 12.8 |
| Going out | 50 | 12.4 |
| Drinking alcohol | 35 | 8.6 |
| Practicing mindfulness (including meditation) | 30 | 7.4 |
| Forgetting one’s job | 23 | 5.7 |
| Reading books or watching movies/TV | 19 | 4.7 |
| Eating | 19 | 4.7 |
| Sleeping | 19 | 4.7 |
| Friend | 14 | 3.5 |
| Music | 12 | 3.0 |
| Enjoyment | 11 | 2.7 |
| Driving | 9 | 2.2 |
| Bathing | 9 | 2.2 |
| Pets | 8 | 2.0 |
| Shopping | 7 | 1.7 |
| Avoiding media | 6 | 1.5 |
| Self-disclosure (including diary use) | 6 | 1.5 |
| Spending time alone | 5 | 1.2 |
| Rhythm of life | 5 | 1.2 |
| Refresh | 5 | 1.2 |
| Volunteering | 4 | 1.0 |
| Colleague | 4 | 1.0 |
| Getting a massage | 4 | 1.0 |
| Relaxing | 3 | 0.7 |
| Nature | 3 | 0.7 |
| Gambling | 2 | 0.5 |
| Receiving medical care (including taking medicine) | 2 | 0.5 |
| Gardening | 2 | 0.5 |
| Working diligently | 1 | 0.3 |
| Studying | 1 | 0.3 |
| Gaming | 1 | 0.3 |
| Reducing workload | 1 | 0.3 |
| Cleaning | 1 | 0.3 |
| Doing a side job | 1 | 0.3 |

**Appendix 4. Multivariate-adjusted β estimates for the IES-R, K6, AIS, and CAGE scores associated with alcohol consumption in 2012 (only male, N=378) a**

|  | (I) Drinking alcohol only (N=12)  vs. (III) Adaptive stress coping only (N=346) | | | | | | (II) Drinking alcohol with adaptive stress coping (N=20)  vs. (III) Adaptive stress coping only (N=346) | | | | | |
| --- | --- | --- | --- | --- | --- | --- | --- | --- | --- | --- | --- | --- |
|  | Effect in 2012 | | | Time-dependent effect  (for 1-year increment) | | | Effect in 2012 | | | Time-dependent effect  (for 1-year increment) | | |
| β | (S.E.) | *P* | β | (S.E.) | *P* | β | (S.E.) | *P* | β | (S.E.) | *P* |
| 1. IES-R score |  |  |  |  |  |  |  |  |  |  |  |  |
| Multivariate-adjusted | 9.60 | (3.66) | 0.009 | -1.52 | (2.21) | 0.49 | -1.11 | (2.78) | 0.69 | 0.58 | (1.99) | 0.77 |
| 1. K6 score |  |  |  |  |  |  |  |  |  |  |  |  |
| Multivariate-adjusted | 2.11 | (1.12) | 0.061 | -1.19 | (0.78) | 0.13 | 0.61 | (0.86) | 0.48 | 0.21 | (0.73) | 0.77 |
| 1. AIS score |  |  |  |  |  |  |  |  |  |  |  |  |
| Multivariate-adjusted | 2.65 | (1.00) | 0.009 | -1.12 | (0.59) | 0.055 | -0.49 | (0.78) | 0.53 | -0.05 | (0.53) | 0.92 |
| 1. CAGE score |  |  |  |  |  |  |  |  |  |  |  |  |
| Multivariate-adjusted | 1.39 | (0.22) | <.0001 | -0.24 | (0.14) | 0.10 | 0.35 | (0.18) | 0.047 | 0.28 | (0.14) | 0.038 |

a Adjusted for baseline age, gender, and job location at the time of the disaster in 2011

**Appendix 5. Multivariate-adjusted β estimates for the IES-R, K6, AIS, and CAGE scores associated with alcohol consumption in 2012 (excluding workers with a history of psychiatric illness, N=397) a**

|  | (I) Drinking alcohol only (N=12)  vs. (III) Adaptive stress coping only (N=363) | | | | | | (II) Drinking alcohol with adaptive stress coping (N=22)  vs. (III) Adaptive stress coping only (N=363) | | | | | |
| --- | --- | --- | --- | --- | --- | --- | --- | --- | --- | --- | --- | --- |
|  | Effect in 2012 | | | Time-dependent effect  (for 1-year increment) | | | Effect in 2012 | | | Time-dependent effect  (for 1-year increment) | | |
| β | (S.E.) | *P* | β | (S.E.) | *P* | β | (S.E.) | *P* | β | (S.E.) | *P* |
| 1. IES-R score |  |  |  |  |  |  |  |  |  |  |  |  |
| Multivariate-adjusted | 9.63 | (3.63) | 0.008 | -1.59 | (2.18) | 0.47 | -0.31 | (2.64) | 0.91 | -0.27 | (1.98) | 0.89 |
| 1. K6 score |  |  |  |  |  |  |  |  |  |  |  |  |
| Multivariate-adjusted | 2.17 | (1.13) | 0.06 | -1.23 | (0.75) | 0.10 | 0.25 | (0.83) | 0.76 | 0.17 | (0.71) | 0.81 |
| 1. AIS score |  |  |  |  |  |  |  |  |  |  |  |  |
| Multivariate-adjusted | 2.68 | (0.99) | 0.007 | -1.15 | (0.58) | 0.047 | -0.38 | (0.74) | 0.61 | -0.10 | (0.54) | 0.85 |
| 1. CAGE score |  |  |  |  |  |  |  |  |  |  |  |  |
| Multivariate-adjusted | 1.38 | (0.23) | <0.001 | -0.24 | (0.15) | 0.11 | 0.44 | (0.17) | 0.012 | 0.22 | (0.14) | 0.12 |

a Adjusted for baseline age, gender, and job location at the time of the disaster in 2011
